# Supplementary material
Source: publisher site journal article supplement (https://www.dovepress.com/article/267471)

**Supplementary Figure 1. The linear association of** **miR-599 and circ_0006916 or SRSF2 abundance in HCC patients.** (A and B) The linear correlation of miR-599 and circ_0006916 or SRSF2 level in HCC tissues was analyzed.


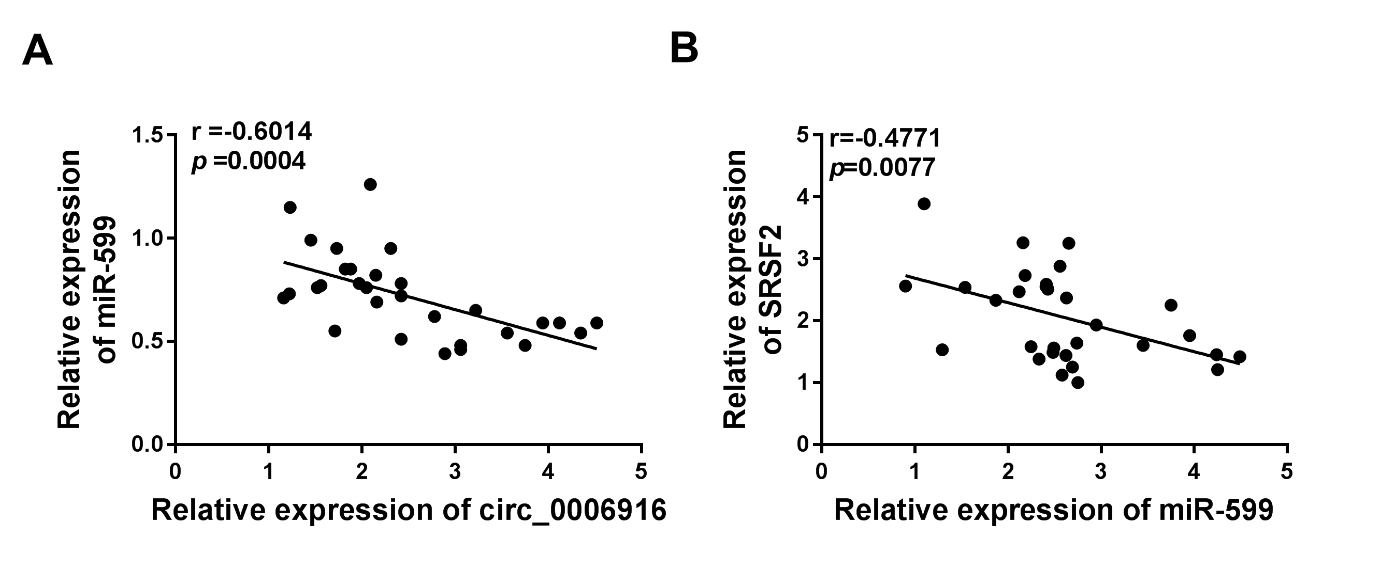

Supplement: Supplementary file 1 [file get_supplementary_file.php]
